# Supplementary material for: The role of secondary interactions on the preferred conformers of the fenchone–ethanol complex
Source: Royal Society of Chemistry journal article supplement (doi:10.1039/c8cp06970k), 2019-01-01

# The role of secondary interactions on the preferred conformers of the fenchone-ethanol complex

Donatella Loru,<sup>† [a]</sup> Isabel Peña, <sup>‡ [a]</sup> M. Eugenia Sanz<sup>\*[a]</sup>

## Supplementary Information

### Table of Contents

#### Experimental and Computational details.

**Table S1.** Binding energies for the lower-energy conformers of fenchone-ethanol.

**Tables S2-S4.** Measured frequencies of the rotational transitions of the three observed conformers of fenchone-ethanol.

**Tables S5-S10.** Measured frequencies of the rotational transitions of the <sup>13</sup>C<sub>1</sub> and <sup>13</sup>C<sub>2</sub>-ethanol isotopologues of the three observed conformers of fenchone-ethanol.

**Table S11, S12.** Experimental spectroscopic parameters of the single substituted <sup>13</sup>C<sub>1</sub> and <sup>13</sup>C<sub>2</sub>-ethanol conformers of fenchone-ethanol complex

**Table S13,S14.** Comparison between substitution and equilibrium B3LYP-D3BJ/6-311++G(d,p) coordinates determined for the C<sub>1</sub> of ethanol.

**Table S15.** Calculated energies in Hartree at different levels of theory of the lower-energy conformers of fenchone-ethanol.

**Figures S1-S4.** Interconversion energy barriers

**Table S1.**  $D_e$  binding energies ( $\text{kJ mol}^{-1}$ ), including BSSE corrections, for the twelve lower-energy conformers of fenchone-ethanol.

| Conformer   | B3LYP-D3BJ | MP2  |
|-------------|------------|------|
| <i>ta1</i>  | 44.8       | 23.6 |
| <i>ta2</i>  | 45.3       | 23.6 |
| <i>g+a1</i> | 51.7       | 25.0 |
| <i>g+a2</i> | 51.3       | 24.7 |
| <i>g-a1</i> | 51.2       | 24.6 |
| <i>g-a2</i> | 51.8       | 25.1 |
| <i>tb</i>   | 42.0       | 21.5 |
| <i>g+b</i>  | 49.0       | 22.8 |
| <i>g-b</i>  | 50.2       | 23.7 |
| <i>tc</i>   | 39.3       | 19.9 |
| <i>g+c</i>  | 47.5       | 21.2 |
| <i>g-c</i>  | 47.3       | 20.7 |

**Table S2.** Measured frequencies and residuals (in MHz) of the rotational transitions of conformer **g+al** of fenchone-ethanol.

| $J'$ | $K'_{-1}$ | $K'_{+1}$ | $J''$ | $K''_{-1}$ | $K''_{+1}$ | $\nu_{\text{obs}}$ | $\nu_{\text{obs}}-\nu_{\text{calc}}$ |
|------|-----------|-----------|-------|------------|------------|--------------------|--------------------------------------|
| 4    | 1         | 4         | 3     | 1          | 3          | 2929.7690          | -0.00165                             |
| 4    | 0         | 4         | 3     | 0          | 3          | 2988.7638          | -0.01622                             |
| 4    | 1         | 3         | 3     | 1          | 2          | 3068.0403          | -0.00789                             |
| 5    | 1         | 5         | 4     | 1          | 4          | 3659.9537          | -0.00305                             |
| 5    | 0         | 5         | 4     | 0          | 4          | 3726.7165          | 0.00352                              |
| 5    | 1         | 4         | 4     | 1          | 3          | 3832.4220          | 0.00092                              |
| 6    | 1         | 6         | 5     | 1          | 5          | 4388.7790          | -0.01147                             |
| 6    | 0         | 6         | 5     | 0          | 5          | 4459.0944          | -0.00849                             |
| 6    | 1         | 5         | 5     | 1          | 4          | 4594.8561          | -0.01055                             |
| 7    | 1         | 7         | 6     | 1          | 6          | 5116.1325          | -0.01116                             |
| 7    | 0         | 7         | 6     | 0          | 6          | 5185.7673          | 0.00368                              |
| 7    | 1         | 6         | 6     | 1          | 5          | 5354.8293          | -0.00297                             |
| 8    | 1         | 8         | 7     | 1          | 7          | 5841.9520          | -0.00020                             |
| 8    | 0         | 8         | 7     | 0          | 7          | 5907.1453          | 0.00145                              |
| 8    | 1         | 7         | 7     | 1          | 6          | 6111.6820          | 0.00031                              |
| 9    | 1         | 9         | 8     | 1          | 8          | 6566.2141          | -0.00028                             |
| 9    | 0         | 9         | 8     | 0          | 8          | 6624.2534          | 0.00303                              |
| 9    | 1         | 8         | 8     | 1          | 7          | 6864.6950          | -0.00404                             |
| 10   | 1         | 10        | 9     | 1          | 9          | 7288.9845          | 0.00015                              |
| 10   | 0         | 10        | 9     | 0          | 9          | 7338.3853          | -0.00037                             |
| 10   | 1         | 9         | 9     | 1          | 8          | 7613.1155          | -0.00018                             |
| 4    | 2         | 3         | 3     | 2          | 2          | 3000.4845          | 0.01642                              |
| 4    | 2         | 2         | 3     | 2          | 1          | 3013.1568          | -0.00171                             |
| 5    | 2         | 4         | 4     | 2          | 3          | 3748.9453          | 0.00107                              |
| 5    | 2         | 3         | 4     | 2          | 2          | 3774.0232          | 0.00289                              |
| 6    | 2         | 4         | 5     | 2          | 3          | 4539.2900          | -0.00255                             |
| 7    | 2         | 6         | 6     | 2          | 5          | 5242.4165          | 0.00331                              |
| 7    | 2         | 5         | 6     | 2          | 4          | 5308.9135          | -0.01062                             |
| 8    | 2         | 7         | 7     | 2          | 6          | 5986.9905          | -0.00027                             |
| 8    | 2         | 6         | 7     | 2          | 5          | 6082.2186          | 0.00124                              |
| 9    | 2         | 8         | 8     | 2          | 7          | 6729.8659          | -0.00506                             |
| 9    | 2         | 7         | 8     | 2          | 6          | 6857.9009          | 0.00295                              |
| 5    | 3         | 3         | 4     | 3          | 2          | 3755.8750          | 0.01184                              |
| 5    | 3         | 2         | 4     | 3          | 1          | 3756.4926          | 0.01004                              |
| 6    | 3         | 4         | 5     | 3          | 3          | 4508.2899          | -0.00549                             |
| 6    | 3         | 3         | 5     | 3          | 2          | 4509.9461          | 0.00420                              |
| 7    | 3         | 5         | 6     | 3          | 4          | 5261.1685          | -0.00332                             |
| 7    | 3         | 4         | 6     | 3          | 3          | 5264.8520          | -0.00468                             |
| 8    | 3         | 6         | 7     | 3          | 5          | 6014.3842          | 0.00122                              |
| 8    | 3         | 5         | 7     | 3          | 4          | 6021.6881          | -0.00267                             |
| 9    | 3         | 7         | 8     | 3          | 6          | 6767.7581          | 0.00141                              |
| 9    | 3         | 6         | 8     | 3          | 5          | 6780.9869          | 0.00077                              |
| 3    | 1         | 2         | 2     | 0          | 2          | 3057.1476          | -0.00035                             |
| 4    | 1         | 3         | 3     | 0          | 3          | 3879.1745          | -0.00323                             |
| 5    | 1         | 4         | 4     | 0          | 4          | 4722.8296          | 0.01081                              |
| 6    | 1         | 5         | 5     | 0          | 5          | 5590.9713          | -0.00116                             |
| 7    | 1         | 6         | 6     | 0          | 6          | 6486.7133          | 0.01146                              |
| 8    | 1         | 7         | 7     | 0          | 7          | 7412.6258          | 0.00589                              |

**Table S3.** Measured frequencies and residuals (in MHz) of the rotational transitions of conformer **g-a2** of fenchone-ethanol.

| $J'$ | $K'_{-1}$ | $K'_{+1}$ | $J''$ | $K''_{-1}$ | $K''_{+1}$ | $\nu_{\text{obs}}$ | $\nu_{\text{obs}}-\nu_{\text{calc}}$ |
|------|-----------|-----------|-------|------------|------------|--------------------|--------------------------------------|
| 4    | 1         | 4         | 3     | 1          | 3          | 2906.7780          | -0.0050                              |
| 4    | 0         | 4         | 3     | 0          | 3          | 2982.3193          | -0.0024                              |
| 4    | 1         | 3         | 3     | 1          | 2          | 3092.9040          | 0.0016                               |
| 5    | 1         | 5         | 4     | 1          | 4          | 3629.7110          | -0.0016                              |
| 5    | 0         | 5         | 4     | 0          | 4          | 3712.2520          | 0.0000                               |
| 5    | 1         | 4         | 4     | 1          | 3          | 3861.4606          | -0.0068                              |
| 6    | 1         | 6         | 5     | 1          | 5          | 4350.4655          | -0.0025                              |
| 6    | 0         | 6         | 5     | 0          | 5          | 4433.4579          | -0.0027                              |
| 6    | 1         | 5         | 5     | 1          | 4          | 4626.5433          | -0.0073                              |
| 7    | 1         | 7         | 6     | 1          | 6          | 5068.9203          | -0.0004                              |
| 7    | 0         | 7         | 6     | 0          | 6          | 5146.4577          | -0.0062                              |
| 7    | 1         | 6         | 6     | 1          | 5          | 5387.0950          | 0.0038                               |
| 8    | 1         | 8         | 7     | 1          | 7          | 5785.0625          | -0.0051                              |
| 8    | 0         | 8         | 7     | 0          | 7          | 5852.9220          | 0.0024                               |
| 8    | 1         | 7         | 7     | 1          | 6          | 6141.8745          | 0.0040                               |
| 9    | 1         | 9         | 8     | 1          | 8          | 6499.0161          | -0.0009                              |
| 9    | 0         | 9         | 8     | 0          | 8          | 6555.0794          | -0.0110                              |
| 9    | 1         | 8         | 8     | 1          | 7          | 6889.5870          | 0.0201                               |
| 4    | 2         | 2         | 3     | 2          | 1          | 3024.5479          | -0.0042                              |
| 5    | 2         | 3         | 4     | 2          | 2          | 3793.4975          | -0.0059                              |
| 6    | 2         | 4         | 5     | 2          | 3          | 4569.2621          | -0.0074                              |
| 7    | 2         | 5         | 6     | 2          | 4          | 5350.9238          | -0.0001                              |
| 8    | 2         | 6         | 7     | 2          | 5          | 6136.3589          | -0.0064                              |
| 5    | 2         | 4         | 4     | 2          | 3          | 3750.4088          | 0.0041                               |
| 6    | 2         | 5         | 5     | 2          | 4          | 4496.4018          | 0.0180                               |
| 7    | 2         | 6         | 6     | 2          | 5          | 5240.1561          | 0.0018                               |
| 8    | 2         | 7         | 7     | 2          | 6          | 5981.4055          | 0.0163                               |
| 5    | 3         | 2         | 4     | 3          | 1          | 3763.7210          | -0.0033                              |
| 6    | 3         | 3         | 5     | 3          | 2          | 4520.5543          | 0.0046                               |
| 7    | 3         | 4         | 6     | 3          | 3          | 5280.2053          | -0.0037                              |
| 4    | 3         | 2         | 3     | 3          | 1          | 3008.5501          | -0.0084                              |
| 5    | 3         | 3         | 4     | 3          | 2          | 3762.3478          | 0.0171                               |
| 6    | 3         | 4         | 5     | 3          | 3          | 4516.8579          | 0.0034                               |
| 7    | 3         | 5         | 6     | 3          | 4          | 5271.9881          | 0.0143                               |
| 8    | 3         | 6         | 7     | 3          | 5          | 6027.4024          | -0.0045                              |
| 9    | 3         | 7         | 8     | 3          | 6          | 6782.7505          | -0.0109                              |
| 4    | 1         | 3         | 3     | 0          | 3          | 3973.6242          | -0.0001                              |
| 5    | 1         | 4         | 4     | 0          | 4          | 4852.7704          | 0.0004                               |
| 6    | 1         | 5         | 5     | 0          | 5          | 5767.0710          | 0.0023                               |
| 7    | 1         | 6         | 6     | 0          | 6          | 6720.6940          | -0.0053                              |
| 2    | 2         | 0         | 1     | 1          | 0          | 3674.5379          | 0.0035                               |
| 3    | 2         | 1         | 2     | 1          | 1          | 4387.8625          | 0.0049                               |
| 4    | 2         | 2         | 3     | 1          | 2          | 5090.6556          | 0.0023                               |
| 5    | 2         | 3         | 4     | 1          | 3          | 5791.2556          | 0.0013                               |
| 7    | 2         | 5         | 6     | 1          | 5          | 7223.4163          | -0.0134                              |

**Table S4.** Measured frequencies and residuals (in MHz) of the rotational transitions of conformer **g-b** of fenchone-ethanol.

| $J'$ | $K'_{-1}$ | $K'_{+1}$ | $J''$ | $K''_{-1}$ | $K''_{+1}$ | $\nu_{\text{obs}}$ | $\nu_{\text{obs}}-\nu_{\text{calc}}$ |
|------|-----------|-----------|-------|------------|------------|--------------------|--------------------------------------|
| 3    | 1         | 3         | 2     | 1          | 2          | 2599.2188          | -0.00294                             |
| 3    | 0         | 3         | 2     | 0          | 2          | 2668.4197          | -0.00752                             |
| 3    | 1         | 2         | 2     | 1          | 1          | 2771.8215          | 0.00386                              |
| 4    | 1         | 4         | 3     | 1          | 3          | 3460.2420          | -0.00265                             |
| 4    | 0         | 4         | 3     | 0          | 3          | 3535.8087          | 0.00010                              |
| 4    | 1         | 3         | 3     | 1          | 2          | 3689.0394          | 0.00537                              |
| 5    | 1         | 5         | 4     | 1          | 4          | 4317.4343          | -0.00170                             |
| 5    | 1         | 4         | 4     | 1          | 3          | 4599.6152          | 0.00397                              |
| 6    | 1         | 6         | 5     | 1          | 5          | 5170.6715          | -0.01891                             |
| 6    | 0         | 6         | 5     | 0          | 5          | 5230.0019          | 0.00159                              |
| 6    | 1         | 5         | 5     | 1          | 4          | 5500.8707          | -0.00333                             |
| 7    | 1         | 7         | 6     | 1          | 6          | 6020.2650          | -0.00087                             |
| 7    | 0         | 7         | 6     | 0          | 6          | 6064.7576          | 0.00119                              |
| 8    | 1         | 8         | 7     | 1          | 7          | 6866.6748          | -0.00354                             |
| 8    | 0         | 8         | 7     | 0          | 7          | 6897.4600          | -0.00736                             |
| 8    | 1         | 7         | 7     | 1          | 6          | 7263.6780          | 0.00623                              |
| 9    | 1         | 9         | 8     | 1          | 8          | 7710.5829          | 0.01712                              |
| 9    | 0         | 9         | 8     | 0          | 8          | 7730.6457          | 0.00256                              |
| 3    | 2         | 1         | 2     | 2          | 0          | 2709.0826          | 0.01287                              |
| 4    | 2         | 3         | 3     | 2          | 2          | 3580.9729          | 0.00229                              |
| 4    | 2         | 2         | 3     | 2          | 1          | 3630.1480          | 0.01310                              |
| 5    | 2         | 4         | 4     | 2          | 3          | 4469.7744          | -0.00008                             |
| 5    | 2         | 3         | 4     | 2          | 2          | 4562.1812          | 0.00633                              |
| 6    | 2         | 5         | 5     | 2          | 4          | 5354.3800          | 0.00061                              |
| 6    | 2         | 4         | 5     | 2          | 3          | 5501.3243          | 0.00339                              |
| 7    | 2         | 6         | 6     | 2          | 5          | 6234.1050          | -0.00582                             |
| 7    | 2         | 5         | 6     | 2          | 4          | 6441.3737          | -0.01330                             |
| 8    | 2         | 7         | 7     | 2          | 6          | 7108.4594          | -0.00202                             |
| 8    | 2         | 6         | 7     | 2          | 5          | 7376.4862          | -0.01363                             |
| 4    | 3         | 1         | 3     | 3          | 0          | 3596.1935          | 0.00880                              |
| 5    | 3         | 3         | 4     | 3          | 2          | 4496.0668          | 0.00758                              |
| 6    | 3         | 4         | 5     | 3          | 3          | 5398.3397          | 0.00354                              |
| 6    | 3         | 3         | 5     | 3          | 2          | 5413.9175          | 0.00125                              |
| 7    | 3         | 5         | 6     | 3          | 4          | 6300.3817          | -0.00234                             |
| 7    | 3         | 4         | 6     | 3          | 3          | 6334.2125          | -0.00082                             |
| 8    | 3         | 5         | 7     | 3          | 4          | 7264.9594          | 0.00520                              |
| 8    | 3         | 6         | 7     | 3          | 5          | 7201.0502          | 0.00584                              |
| 6    | 4         | 3         | 5     | 4          | 2          | 5394.7461          | -0.00215                             |
| 6    | 4         | 2         | 5     | 4          | 1          | 5395.2238          | -0.00327                             |
| 7    | 4         | 4         | 6     | 4          | 3          | 6298.6230          | 0.01051                              |
| 7    | 4         | 3         | 6     | 4          | 2          | 6300.1711          | -0.02138                             |
| 8    | 4         | 5         | 7     | 4          | 4          | 7204.1965          | 0.00053                              |
| 8    | 4         | 4         | 7     | 4          | 3          | 7208.4753          | 0.00238                              |

**Table S5.** Measured frequencies and residuals (in MHz) of the rotational transitions of the  $^{13}\text{C}_1$ -ethanol isotopologue of conformer **g+a1** of fenchone-ethanol.

| $J'$ | $K'_{-1}$ | $K'_{+1}$ | $J''$ | $K''_{-1}$ | $K''_{+1}$ | $\nu_{\text{obs}}$ | $\nu_{\text{obs}}-\nu_{\text{calc}}$ |
|------|-----------|-----------|-------|------------|------------|--------------------|--------------------------------------|
| 3    | 0         | 3         | 2     | 0          | 2          | 2216.1280          | -0.0040                              |
| 3    | 1         | 2         | 2     | 1          | 1          | 2270.7595          | 0.0013                               |
| 4    | 1         | 4         | 3     | 1          | 3          | 2891.4584          | 0.0024                               |
| 4    | 1         | 3         | 3     | 1          | 2          | 3026.1844          | -0.0002                              |
| 5    | 1         | 5         | 4     | 1          | 4          | 3612.1862          | 0.0005                               |
| 5    | 0         | 5         | 4     | 0          | 4          | 3677.8235          | -0.0017                              |
| 5    | 1         | 4         | 4     | 1          | 3          | 3780.2470          | -0.0012                              |
| 6    | 1         | 6         | 5     | 1          | 5          | 4331.6311          | -0.0004                              |
| 6    | 0         | 6         | 5     | 0          | 5          | 4401.1088          | -0.0026                              |
| 6    | 1         | 5         | 5     | 1          | 4          | 4532.5040          | 0.0006                               |
| 7    | 1         | 7         | 6     | 1          | 6          | 5049.6715          | 0.0041                               |
| 7    | 0         | 7         | 6     | 0          | 6          | 5118.8915          | -0.0045                              |
| 7    | 1         | 6         | 6     | 1          | 5          | 5282.4370          | 0.0014                               |
| 8    | 1         | 8         | 7     | 1          | 7          | 5766.2295          | 0.0030                               |
| 8    | 0         | 8         | 7     | 0          | 7          | 5831.5340          | -0.0049                              |
| 8    | 1         | 7         | 7     | 1          | 6          | 6029.4505          | -0.0023                              |
| 9    | 1         | 9         | 8     | 1          | 8          | 6481.3045          | 0.0042                               |
| 9    | 0         | 9         | 8     | 0          | 8          | 6539.9280          | -0.0087                              |
| 9    | 1         | 8         | 8     | 1          | 7          | 6772.8910          | 0.0035                               |
| 10   | 0         | 10        | 9     | 0          | 9          | 7245.2950          | -0.0039                              |
| 10   | 1         | 9         | 9     | 1          | 8          | 7512.0250          | 0.0065                               |
| 4    | 2         | 3         | 3     | 2          | 2          | 2960.2905          | 0.0009                               |
| 5    | 2         | 4         | 4     | 2          | 3          | 3698.8140          | 0.0012                               |
| 6    | 2         | 5         | 5     | 2          | 4          | 4436.3000          | -0.0062                              |
| 7    | 2         | 6         | 6     | 2          | 5          | 5172.5750          | 0.0055                               |
| 8    | 2         | 7         | 7     | 2          | 6          | 5907.4170          | 0.0075                               |
| 9    | 2         | 8         | 8     | 2          | 7          | 6640.6555          | 0.0119                               |
| 4    | 2         | 2         | 3     | 2          | 1          | 2972.2648          | 0.0021                               |
| 5    | 2         | 3         | 4     | 2          | 2          | 3722.4895          | 0.0000                               |
| 6    | 2         | 4         | 5     | 2          | 3          | 4476.9235          | 0.0002                               |
| 7    | 2         | 5         | 6     | 2          | 4          | 5235.5773          | 0.0096                               |
| 8    | 2         | 6         | 7     | 2          | 5          | 5997.8230          | -0.0062                              |
| 9    | 2         | 7         | 8     | 2          | 6          | 6762.5584          | -0.0028                              |
| 10   | 2         | 8         | 9     | 2          | 7          | 7528.2730          | -0.0071                              |
| 4    | 3         | 2         | 3     | 3          | 1          | 2963.5557          | 0.0051                               |
| 5    | 3         | 3         | 4     | 3          | 2          | 3705.3487          | -0.0019                              |
| 6    | 3         | 4         | 5     | 3          | 3          | 4447.6165          | -0.0026                              |
| 7    | 3         | 5         | 6     | 3          | 4          | 5190.3186          | -0.0002                              |
| 8    | 3         | 6         | 7     | 3          | 5          | 5933.3537          | 0.0013                               |
| 9    | 3         | 7         | 8     | 3          | 6          | 6676.5668          | 0.0026                               |
| 6    | 3         | 3         | 5     | 3          | 2          | 4449.1187          | -0.0046                              |
| 7    | 3         | 4         | 6     | 3          | 3          | 5193.6865          | 0.0003                               |
| 8    | 3         | 5         | 7     | 3          | 4          | 5940.0250          | -0.0094                              |

**Table S6.** Measured frequencies and residuals (in MHz) of the rotational transitions of the  $^{13}\text{C}_2$ -ethanol isotopologue of conformer **g+a1** of fenchone-ethanol.

| $J'$ | $K'_{-1}$ | $K'_{+1}$ | $J''$ | $K''_{-1}$ | $K''_{+1}$ | $\nu_{\text{obs}}$ | $\nu_{\text{obs}}-\nu_{\text{calc}}$ |
|------|-----------|-----------|-------|------------|------------|--------------------|--------------------------------------|
| 3    | 1         | 3         | 2     | 1          | 2          | 2170.8130          | 0.0042                               |
| 3    | 2         | 2         | 2     | 2          | 1          | 2221.5980          | 0.0130                               |
| 3    | 2         | 1         | 2     | 2          | 0          | 2226.3303          | 0.0005                               |
| 3    | 1         | 2         | 2     | 1          | 1          | 2270.8850          | -0.0012                              |
| 4    | 1         | 4         | 3     | 1          | 3          | 2893.0489          | -0.0032                              |
| 4    | 2         | 3         | 3     | 2          | 2          | 2961.1616          | 0.0004                               |
| 4    | 2         | 2         | 3     | 2          | 1          | 2972.9590          | -0.0001                              |
| 4    | 1         | 3         | 3     | 1          | 2          | 3026.3755          | 0.0003                               |
| 5    | 1         | 5         | 4     | 1          | 4          | 3614.2042          | -0.0022                              |
| 5    | 0         | 5         | 4     | 0          | 4          | 3679.2356          | 0.0011                               |
| 5    | 2         | 4         | 4     | 2          | 3          | 3699.9213          | -0.0007                              |
| 5    | 2         | 3         | 4     | 2          | 2          | 3723.2538          | -0.0006                              |
| 5    | 1         | 4         | 4     | 1          | 3          | 3780.5190          | -0.0010                              |
| 6    | 1         | 6         | 5     | 1          | 5          | 4334.0907          | -0.0006                              |
| 6    | 0         | 6         | 5     | 0          | 5          | 4402.9666          | 0.0006                               |
| 6    | 2         | 5         | 5     | 2          | 4          | 4437.6669          | 0.0010                               |
| 6    | 3         | 4         | 5     | 3          | 3          | 4448.8091          | -0.0006                              |
| 6    | 3         | 3         | 5     | 3          | 2          | 4450.2854          | 0.0007                               |
| 6    | 2         | 4         | 5     | 2          | 3          | 4477.6974          | -0.0017                              |
| 6    | 1         | 5         | 5     | 1          | 4          | 4532.8817          | 0.0000                               |
| 7    | 1         | 7         | 6     | 1          | 6          | 5052.5812          | 0.0002                               |
| 7    | 0         | 7         | 6     | 0          | 6          | 5121.2591          | -0.0004                              |
| 7    | 2         | 6         | 6     | 2          | 5          | 5174.2009          | 0.0058                               |
| 7    | 3         | 5         | 6     | 3          | 4          | 5191.6906          | 0.0074                               |
| 7    | 3         | 4         | 6     | 3          | 3          | 5194.9848          | -0.0009                              |
| 7    | 2         | 5         | 6     | 2          | 4          | 5236.3030          | 0.0005                               |
| 7    | 1         | 6         | 6     | 1          | 5          | 5282.9498          | -0.0037                              |
| 8    | 1         | 8         | 7     | 1          | 7          | 5769.6037          | -0.0042                              |
| 8    | 0         | 8         | 7     | 0          | 7          | 5834.4574          | -0.0036                              |
| 8    | 2         | 7         | 7     | 2          | 6          | 5909.3169          | -0.0016                              |
| 8    | 3         | 6         | 7     | 3          | 5          | 5934.8840          | -0.0013                              |
| 8    | 3         | 5         | 7     | 3          | 4          | 5941.4383          | -0.0010                              |
| 8    | 2         | 6         | 7     | 2          | 5          | 5998.4896          | 0.0020                               |
| 8    | 1         | 7         | 7     | 1          | 6          | 6030.1500          | -0.0027                              |
| 9    | 1         | 9         | 8     | 1          | 8          | 6485.1632          | 0.0012                               |
| 9    | 0         | 9         | 8     | 0          | 8          | 6543.4487          | 0.0023                               |
| 9    | 2         | 8         | 8     | 2          | 7          | 6642.8496          | -0.0058                              |
| 9    | 3         | 7         | 8     | 3          | 6          | 6678.2620          | -0.0012                              |
| 9    | 3         | 6         | 8     | 3          | 5          | 6690.1389          | -0.0009                              |
| 9    | 2         | 7         | 8     | 2          | 6          | 6763.1277          | -0.0033                              |
| 9    | 1         | 8         | 8     | 1          | 7          | 6773.8196          | -0.0025                              |
| 10   | 1         | 10        | 9     | 1          | 9          | 7199.2819          | -0.0032                              |
| 10   | 0         | 10        | 9     | 0          | 9          | 7249.4094          | 0.0054                               |
| 10   | 2         | 9         | 9     | 2          | 8          | 7374.6469          | 0.0061                               |
| 10   | 3         | 8         | 9     | 3          | 7          | 7421.6110          | -0.0007                              |
| 10   | 3         | 7         | 9     | 3          | 6          | 7441.6285          | -0.0049                              |
| 10   | 1         | 9         | 9     | 1          | 8          | 7513.2834          | 0.0323                               |
| 10   | 2         | 8         | 9     | 2          | 7          | 7528.7822          | 0.0084                               |

**Table S7.** Measured frequencies and residuals (in MHz) of the rotational transitions of the  $^{13}\text{C}_1$ -ethanol isotopologue of conformer **g-a2** of fenchone-ethanol.

| $J'$ | $K'_{-1}$ | $K'_{+1}$ | $J''$ | $K''_{-1}$ | $K''_{+1}$ | $\nu_{\text{obs}}$ | $\nu_{\text{obs}}-\nu_{\text{calc}}$ |
|------|-----------|-----------|-------|------------|------------|--------------------|--------------------------------------|
| 3    | 1         | 3         | 2     | 1          | 2          | 2153.8395          | 0.0045                               |
| 3    | 0         | 3         | 2     | 0          | 2          | 2214.7946          | 0.0058                               |
| 3    | 1         | 2         | 2     | 1          | 1          | 2289.8218          | -0.0002                              |
| 4    | 1         | 4         | 3     | 1          | 3          | 2869.4592          | -0.0010                              |
| 4    | 0         | 4         | 3     | 0          | 3          | 2943.4850          | -0.0011                              |
| 4    | 1         | 3         | 3     | 1          | 2          | 3050.4925          | -0.0014                              |
| 5    | 1         | 5         | 4     | 1          | 4          | 3583.2708          | -0.0001                              |
| 5    | 0         | 5         | 4     | 0          | 4          | 3664.5803          | -0.0004                              |
| 5    | 1         | 4         | 4     | 1          | 3          | 3808.7490          | -0.0009                              |
| 6    | 1         | 6         | 5     | 1          | 5          | 4295.0187          | -0.0003                              |
| 6    | 0         | 6         | 5     | 0          | 5          | 4377.3462          | -0.0004                              |
| 6    | 1         | 5         | 5     | 1          | 4          | 4563.7531          | -0.0004                              |
| 7    | 1         | 7         | 6     | 1          | 6          | 5004.5702          | -0.0025                              |
| 7    | 0         | 7         | 6     | 0          | 6          | 5082.1607          | 0.0005                               |
| 7    | 1         | 6         | 6     | 1          | 5          | 5314.5233          | 0.0019                               |
| 8    | 1         | 8         | 7     | 1          | 7          | 5711.9185          | 0.0021                               |
| 8    | 0         | 8         | 7     | 0          | 7          | 5780.4831          | 0.0000                               |
| 8    | 1         | 7         | 7     | 1          | 6          | 6059.9220          | -0.0003                              |
| 9    | 1         | 9         | 8     | 1          | 8          | 6417.1434          | 0.0033                               |
| 9    | 0         | 9         | 8     | 0          | 8          | 6474.4135          | 0.0019                               |
| 9    | 1         | 8         | 8     | 1          | 7          | 6798.7210          | 0.0011                               |
| 10   | 1         | 10        | 9     | 1          | 9          | 7120.4160          | -0.0013                              |
| 10   | 0         | 10        | 9     | 0          | 9          | 7166.0241          | -0.0013                              |
| 10   | 1         | 9         | 9     | 1          | 8          | 7529.6955          | 0.0038                               |
| 11   | 1         | 11        | 10    | 1          | 10         | 7821.9762          | -0.0019                              |
| 11   | 0         | 11        | 10    | 0          | 10         | 7856.9030          | -0.0056                              |
| 4    | 2         | 3         | 3     | 2          | 2          | 2962.5420          | 0.0034                               |
| 5    | 2         | 4         | 4     | 2          | 3          | 3700.5354          | -0.0003                              |
| 6    | 2         | 5         | 5     | 2          | 4          | 4436.7870          | 0.0022                               |
| 7    | 2         | 6         | 6     | 2          | 5          | 5170.9663          | 0.0114                               |
| 9    | 2         | 8         | 8     | 2          | 7          | 6631.8526          | 0.0049                               |
| 10   | 2         | 9         | 9     | 2          | 8          | 7358.0650          | 0.0084                               |
| 4    | 2         | 2         | 3     | 2          | 1          | 2983.2212          | -0.0045                              |
| 5    | 2         | 3         | 4     | 2          | 2          | 3741.1393          | -0.0021                              |
| 6    | 2         | 4         | 5     | 2          | 3          | 4505.5917          | -0.0021                              |
| 7    | 2         | 5         | 6     | 2          | 4          | 5275.8185          | -0.0041                              |
| 8    | 2         | 6         | 7     | 2          | 5          | 6049.9505          | -0.0028                              |
| 9    | 2         | 7         | 8     | 2          | 6          | 6825.4207          | -0.0108                              |
| 10   | 2         | 8         | 9     | 2          | 7          | 7599.6443          | -0.0086                              |
| 4    | 3         | 2         | 3     | 3          | 1          | 2968.1785          | 0.0015                               |
| 5    | 3         | 3         | 4     | 3          | 2          | 3711.7700          | 0.0012                               |
| 6    | 3         | 4         | 5     | 3          | 3          | 4456.0856          | 0.0005                               |
| 7    | 3         | 5         | 6     | 3          | 4          | 5200.9926          | 0.0024                               |
| 8    | 3         | 6         | 7     | 3          | 5          | 5946.2340          | 0.0025                               |
| 9    | 3         | 7         | 8     | 3          | 6          | 6691.4525          | 0.0004                               |
| 10   | 3         | 8         | 9     | 3          | 7          | 7436.2219          | 0.0091                               |
| 4    | 3         | 1         | 3     | 3          | 0          | 2968.5363          | -0.0037                              |
| 5    | 3         | 2         | 4     | 3          | 1          | 3713.0352          | -0.0007                              |
| 6    | 3         | 3         | 5     | 3          | 2          | 4459.4420          | -0.0034                              |
| 7    | 3         | 4         | 6     | 3          | 3          | 5208.4836          | -0.0003                              |
| 8    | 3         | 5         | 7     | 3          | 4          | 5961.0135          | 0.0013                               |
| 9    | 3         | 6         | 8     | 3          | 5          | 6717.9887          | -0.0038                              |
| 10   | 3         | 7         | 9     | 3          | 6          | 7480.3645          | -0.0032                              |
| 5    | 4         | 2         | 4     | 4          | 1          | 3709.8287          | 0.0027                               |
| 5    | 4         | 1         | 4     | 4          | 0          | 3709.8287          | -0.0089                              |
| 7    | 4         | 4         | 6     | 4          | 3          | 5197.5318          | 0.0045                               |
| 8    | 4         | 5         | 7     | 4          | 4          | 5942.6497          | -0.0052                              |
| 10   | 4         | 7         | 9     | 4          | 6          | 7435.7648          | -0.0017                              |
| 7    | 4         | 3         | 6     | 4          | 2          | 5197.6981          | -0.0027                              |



|    |   |   |   |   |   |           |         |
|----|---|---|---|---|---|-----------|---------|
| 8  | 4 | 4 | 7 | 4 | 3 | 5943.1207 | -0.0093 |
| 9  | 4 | 5 | 8 | 4 | 4 | 6689.8707 | 0.0087  |
| 10 | 4 | 6 | 9 | 4 | 5 | 7438.2006 | -0.0011 |
| 6  | 5 | 2 | 5 | 5 | 1 | 4451.3914 | -0.0085 |
| 6  | 5 | 1 | 5 | 5 | 0 | 4451.3914 | -0.0088 |
| 7  | 5 | 3 | 6 | 5 | 2 | 5194.5860 | 0.0013  |
| 9  | 5 | 5 | 8 | 5 | 4 | 6682.8332 | 0.0153  |
| 9  | 5 | 4 | 8 | 5 | 3 | 6682.8332 | -0.0070 |
| 10 | 5 | 6 | 9 | 5 | 5 | 7428.0368 | 0.0043  |
| 3  | 1 | 2 | 2 | 0 | 2 | 3095.5463 | -0.0003 |
| 5  | 1 | 4 | 4 | 0 | 4 | 4796.5115 | -0.0040 |
| 6  | 1 | 5 | 5 | 0 | 5 | 5695.7039 | 0.0156  |
| 7  | 1 | 6 | 6 | 0 | 6 | 6632.8628 | -0.0003 |
| 2  | 2 | 0 | 1 | 1 | 0 | 3668.3330 | -0.0017 |
| 3  | 2 | 1 | 2 | 1 | 1 | 4372.3787 | 0.0027  |
| 4  | 2 | 2 | 3 | 1 | 2 | 5065.7805 | 0.0008  |
| 5  | 2 | 3 | 4 | 1 | 3 | 5756.4332 | 0.0060  |
| 6  | 2 | 4 | 5 | 1 | 4 | 6453.2657 | -0.0054 |
| 7  | 2 | 5 | 6 | 1 | 5 | 7165.3321 | -0.0081 |

---

**Table S8.** Measured frequencies and residuals (in MHz) of the rotational transitions of the  $^{13}\text{C}_2$ -ethanol isotopologue of conformer **g-a2** of fenchone-ethanol.

| $J'$ | $K'_{-1}$ | $K'_{+1}$ | $J''$ | $K''_{-1}$ | $K''_{+1}$ | $\nu_{\text{obs}}$ | $\nu_{\text{obs}}-\nu_{\text{calc}}$ |
|------|-----------|-----------|-------|------------|------------|--------------------|--------------------------------------|
| 3    | 1         | 3         | 2     | 1          | 2          | 2154.0379          | -0.0019                              |
| 3    | 0         | 3         | 2     | 0          | 2          | 2215.0790          | -0.0019                              |
| 3    | 2         | 2         | 2     | 2          | 1          | 2223.5046          | 0.0018                               |
| 3    | 2         | 1         | 2     | 2          | 0          | 2231.9270          | -0.0012                              |
| 3    | 1         | 2         | 2     | 1          | 1          | 2290.3238          | -0.0021                              |
| 4    | 1         | 4         | 3     | 1          | 3          | 2869.7135          | 0.0009                               |
| 4    | 0         | 4         | 3     | 0          | 3          | 2943.7918          | -0.0007                              |
| 4    | 2         | 3         | 3     | 2          | 2          | 2963.0110          | -0.0007                              |
| 4    | 3         | 2         | 3     | 3          | 1          | 2968.7080          | 0.0079                               |
| 4    | 3         | 1         | 3     | 3          | 0          | 2969.0658          | -0.0029                              |
| 4    | 2         | 2         | 3     | 2          | 1          | 2983.8770          | -0.0021                              |
| 5    | 1         | 5         | 4     | 1          | 4          | 3583.5567          | 0.0007                               |
| 5    | 0         | 5         | 4     | 0          | 4          | 3664.8444          | 0.0012                               |
| 5    | 2         | 4         | 4     | 2          | 3          | 3701.1034          | 0.0011                               |
| 5    | 4         | 1         | 4     | 4          | 0          | 3710.4811          | -0.0088                              |
| 5    | 3         | 3         | 4     | 3          | 2          | 3712.4326          | 0.0002                               |
| 5    | 3         | 2         | 4     | 3          | 1          | 3713.7162          | -0.0027                              |
| 5    | 2         | 3         | 4     | 2          | 2          | 3742.0500          | -0.0021                              |
| 5    | 1         | 4         | 4     | 1          | 3          | 3809.5160          | 0.0006                               |
| 6    | 1         | 6         | 5     | 1          | 5          | 4295.3210          | 0.0000                               |
| 6    | 0         | 6         | 5     | 0          | 5          | 4377.5156          | 0.0005                               |
| 6    | 2         | 5         | 5     | 2          | 4          | 4437.4299          | 0.0015                               |
| 6    | 5         | 1         | 5     | 5          | 0          | 4452.1912          | 0.0113                               |
| 6    | 3         | 4         | 5     | 3          | 3          | 4456.8909          | -0.0002                              |
| 6    | 3         | 3         | 5     | 3          | 2          | 4460.3011          | -0.0024                              |
| 6    | 2         | 4         | 5     | 2          | 3          | 4506.7922          | -0.0015                              |
| 6    | 1         | 5         | 5     | 1          | 4          | 4564.6043          | 0.0007                               |
| 7    | 1         | 7         | 6     | 1          | 6          | 5004.8768          | 0.0001                               |
| 7    | 0         | 7         | 6     | 0          | 6          | 5082.2093          | -0.0002                              |
| 7    | 2         | 6         | 6     | 2          | 5          | 5171.6648          | 0.0084                               |
| 7    | 4         | 4         | 6     | 4          | 3          | 5198.4700          | 0.0025                               |
| 7    | 4         | 3         | 6     | 4          | 2          | 5198.6431          | -0.0017                              |
| 7    | 3         | 5         | 6     | 3          | 4          | 5201.9377          | 0.0008                               |
| 7    | 3         | 4         | 6     | 3          | 3          | 5209.5434          | -0.0025                              |
| 7    | 2         | 5         | 6     | 2          | 4          | 5277.3102          | -0.0045                              |
| 7    | 1         | 6         | 6     | 1          | 5          | 5315.4139          | 0.0036                               |
| 8    | 1         | 8         | 7     | 1          | 7          | 5712.2107          | 0.0011                               |
| 8    | 0         | 8         | 7     | 0          | 7          | 5780.4222          | 0.0020                               |
| 8    | 2         | 7         | 7     | 2          | 6          | 5903.4742          | 0.0008                               |
| 8    | 4         | 5         | 7     | 4          | 4          | 5943.7502          | 0.0029                               |
| 8    | 4         | 4         | 7     | 4          | 3          | 5944.2245          | -0.0085                              |
| 8    | 3         | 6         | 7     | 3          | 5          | 5947.3134          | 0.0010                               |
| 8    | 3         | 5         | 7     | 3          | 4          | 5962.3150          | -0.0024                              |
| 8    | 2         | 6         | 7     | 2          | 5          | 6051.6911          | -0.0124                              |
| 8    | 1         | 7         | 7     | 1          | 6          | 6060.7866          | -0.0046                              |
| 9    | 1         | 9         | 8     | 1          | 8          | 6417.4165          | 0.0038                               |
| 9    | 0         | 9         | 8     | 0          | 8          | 6474.2704          | 0.0016                               |
| 9    | 2         | 8         | 8     | 2          | 7          | 6632.6058          | 0.0073                               |
| 9    | 4         | 5         | 8     | 4          | 4          | 6691.1383          | 0.0016                               |
| 9    | 3         | 7         | 8     | 3          | 6          | 6692.6569          | 0.0019                               |
| 9    | 3         | 6         | 8     | 3          | 5          | 6719.5825          | -0.0075                              |
| 9    | 1         | 8         | 8     | 1          | 7          | 6799.5006          | 0.0031                               |
| 9    | 2         | 7         | 8     | 2          | 6          | 6827.3705          | -0.0039                              |
| 10   | 1         | 10        | 9     | 1          | 9          | 7120.6655          | 0.0025                               |
| 10   | 0         | 10        | 9     | 0          | 9          | 7165.8463          | 0.0022                               |
| 10   | 2         | 9         | 9     | 2          | 8          | 7358.8070          | 0.0106                               |
| 10   | 4         | 7         | 9     | 4          | 6          | 7437.1762          | -0.0004                              |
| 10   | 3         | 8         | 9     | 3          | 7          | 7437.5238          | 0.0046                               |
| 10   | 4         | 6         | 9     | 4          | 5          | 7439.6652          | -0.0004                              |

|    |   |    |    |   |    |           |         |
|----|---|----|----|---|----|-----------|---------|
| 10 | 3 | 7  | 9  | 3 | 6  | 7482.3058 | -0.0054 |
| 10 | 1 | 9  | 9  | 1 | 8  | 7530.3115 | 0.0128  |
| 10 | 2 | 8  | 9  | 2 | 7  | 7601.6970 | -0.0101 |
| 11 | 1 | 11 | 10 | 1 | 10 | 7822.1910 | -0.0025 |
| 11 | 0 | 11 | 10 | 0 | 10 | 7856.7158 | -0.0084 |
| 3  | 1 | 2  | 2  | 0 | 2  | 3092.9491 | -0.0023 |
| 2  | 2 | 1  | 1  | 1 | 1  | 3702.0787 | -0.0009 |
| 4  | 1 | 3  | 3  | 0 | 3  | 3929.0105 | -0.0007 |
| 3  | 2 | 1  | 2  | 1 | 1  | 4362.8790 | -0.0025 |
| 3  | 2 | 2  | 2  | 1 | 2  | 4488.6870 | -0.0028 |
| 5  | 1 | 4  | 4  | 0 | 4  | 4794.7365 | 0.0024  |
| 5  | 2 | 3  | 4  | 1 | 3  | 5747.3447 | -0.0014 |
| 3  | 3 | 0  | 2  | 2 | 0  | 5884.4286 | 0.0022  |
| 3  | 3 | 1  | 2  | 2 | 1  | 5886.4828 | 0.0040  |
| 6  | 2 | 4  | 5  | 1 | 4  | 6444.6217 | -0.0026 |
| 4  | 3 | 1  | 3  | 2 | 1  | 6621.5700 | 0.0030  |
| 4  | 3 | 2  | 3  | 2 | 2  | 6631.6618 | -0.0143 |
| 7  | 1 | 6  | 6  | 0 | 6  | 6632.3923 | 0.0025  |
| 6  | 2 | 5  | 5  | 1 | 5  | 6982.9260 | 0.0023  |
| 7  | 2 | 5  | 6  | 1 | 5  | 7157.3331 | -0.0023 |
| 5  | 3 | 2  | 4  | 2 | 2  | 7351.4101 | 0.0033  |
| 5  | 3 | 3  | 4  | 2 | 3  | 7381.1010 | 0.0042  |
| 8  | 1 | 7  | 7  | 0 | 7  | 7610.9742 | 0.0027  |
| 7  | 2 | 6  | 6  | 1 | 6  | 7859.2724 | 0.0133  |
| 8  | 2 | 6  | 7  | 1 | 6  | 7893.6146 | -0.0139 |

---

**Table S9.** Measured frequencies and residuals (in MHz) of the rotational transitions of the  $^{13}\text{C}_1$ -ethanol isotopologue of conformer **g-b** of fenchone-ethanol.

| $J'$ | $K'_{-1}$ | $K'_{+1}$ | $J''$ | $K''_{-1}$ | $K''_{+1}$ | $\nu_{\text{obs}}$ | $\nu_{\text{obs}}-\nu_{\text{calc}}$ |
|------|-----------|-----------|-------|------------|------------|--------------------|--------------------------------------|
| 3    | 1         | 3         | 2     | 1          | 2          | 2565.2240          | 0.0010                               |
| 3    | 0         | 3         | 2     | 0          | 2          | 2633.2107          | -0.0014                              |
| 3    | 1         | 2         | 2     | 1          | 1          | 2733.2397          | 0.0055                               |
| 4    | 1         | 4         | 3     | 1          | 3          | 3415.2332          | -0.0036                              |
| 4    | 0         | 4         | 3     | 0          | 3          | 3490.1437          | -0.0005                              |
| 4    | 1         | 3         | 3     | 1          | 2          | 3638.0545          | 0.0077                               |
| 5    | 1         | 5         | 4     | 1          | 4          | 4261.6155          | -0.0059                              |
| 5    | 0         | 5         | 4     | 0          | 4          | 4333.1676          | -0.0063                              |
| 5    | 1         | 4         | 4     | 1          | 3          | 4536.7039          | 0.0052                               |
| 6    | 1         | 6         | 5     | 1          | 5          | 5104.2410          | -0.0051                              |
| 6    | 0         | 6         | 5     | 0          | 5          | 5164.7287          | -0.0057                              |
| 6    | 1         | 5         | 5     | 1          | 4          | 5426.7227          | -0.0020                              |
| 7    | 1         | 7         | 6     | 1          | 6          | 5943.3199          | -0.0001                              |
| 7    | 0         | 7         | 6     | 0          | 6          | 5989.4827          | 0.0025                               |
| 7    | 1         | 6         | 6     | 1          | 5          | 6305.3064          | -0.0063                              |
| 8    | 1         | 8         | 7     | 1          | 7          | 6779.3140          | 0.0117                               |
| 8    | 1         | 7         | 7     | 1          | 6          | 7169.8238          | 0.0047                               |
| 3    | 2         | 2         | 2     | 2          | 1          | 2652.2502          | 0.0042                               |
| 3    | 2         | 1         | 2     | 2          | 0          | 2671.2942          | 0.0084                               |
| 4    | 2         | 3         | 3     | 2          | 2          | 3532.5639          | 0.0023                               |
| 4    | 2         | 2         | 3     | 2          | 1          | 3578.7322          | 0.0028                               |
| 4    | 3         | 2         | 3     | 3          | 1          | 3545.2090          | -0.0010                              |
| 5    | 2         | 4         | 4     | 2          | 3          | 4409.6781          | 0.0029                               |
| 5    | 2         | 3         | 4     | 2          | 2          | 4496.7956          | 0.0022                               |
| 5    | 3         | 3         | 4     | 3          | 2          | 4434.3670          | 0.0010                               |
| 6    | 2         | 5         | 5     | 2          | 4          | 5282.8531          | 0.0012                               |
| 6    | 2         | 4         | 5     | 2          | 3          | 5422.1361          | 0.0003                               |
| 6    | 3         | 4         | 5     | 3          | 3          | 5324.2315          | -0.0029                              |
| 6    | 2         | 4         | 5     | 2          | 3          | 5422.1361          | 0.0003                               |
| 7    | 2         | 6         | 6     | 2          | 5          | 6151.4438          | -0.0040                              |
| 7    | 2         | 5         | 6     | 2          | 4          | 6349.0534          | -0.0104                              |

**Table S10.** Measured frequencies and residuals (in MHz) of the rotational transitions of the  $^{13}\text{C}_2$ -ethanol isotopologue of conformer **g-b** of fenchone-ethanol.

| $J'$ | $K'_{-1}$ | $K'_{+1}$ | $J''$ | $K''_{-1}$ | $K''_{+1}$ | $\nu_{\text{obs}}$ | $\nu_{\text{obs}}-\nu_{\text{calc}}$ |
|------|-----------|-----------|-------|------------|------------|--------------------|--------------------------------------|
| 3    | 1         | 3         | 2     | 1          | 2          | 2571.7070          | -0.0070                              |
| 3    | 0         | 3         | 2     | 0          | 2          | 2640.1849          | 0.0006                               |
| 3    | 2         | 2         | 2     | 2          | 1          | 2659.9057          | 0.0040                               |
| 3    | 1         | 2         | 2     | 1          | 1          | 2741.8389          | 0.0093                               |
| 4    | 1         | 4         | 3     | 1          | 3          | 3423.7131          | -0.0070                              |
| 4    | 0         | 4         | 3     | 0          | 3          | 3498.7569          | -0.0035                              |
| 4    | 2         | 3         | 3     | 2          | 2          | 3542.6326          | 0.0012                               |
| 4    | 3         | 2         | 3     | 3          | 1          | 3555.7289          | 0.0007                               |
| 4    | 3         | 1         | 3     | 3          | 0          | 3557.3792          | 0.0057                               |
| 4    | 2         | 2         | 3     | 2          | 1          | 3590.3909          | 0.0063                               |
| 4    | 1         | 3         | 3     | 1          | 2          | 3649.2712          | 0.0082                               |
| 5    | 0         | 5         | 4     | 0          | 4          | 4343.1336          | -0.0039                              |
| 5    | 2         | 4         | 4     | 2          | 3          | 4422.0449          | 0.0019                               |
| 5    | 3         | 3         | 4     | 3          | 2          | 4447.5777          | -0.0014                              |
| 5    | 2         | 3         | 4     | 2          | 2          | 4511.9493          | 0.0081                               |
| 5    | 1         | 4         | 4     | 1          | 3          | 4550.2851          | 0.0060                               |
| 6    | 1         | 6         | 5     | 1          | 5          | 5116.4040          | -0.0069                              |
| 6    | 0         | 6         | 5     | 0          | 5          | 5175.9985          | -0.0057                              |
| 6    | 2         | 5         | 5     | 2          | 4          | 5297.3811          | 0.0026                               |
| 6    | 5         | 1         | 5     | 5          | 0          | 5332.2208          | -0.0036                              |
| 6    | 5         | 2         | 5     | 5          | 1          | 5332.2208          | 0.0016                               |
| 6    | 4         | 3         | 5     | 4          | 2          | 5336.5424          | -0.0009                              |
| 6    | 4         | 2         | 5     | 4          | 1          | 5336.9914          | -0.0017                              |
| 6    | 3         | 4         | 5     | 3          | 3          | 5340.1248          | 0.0039                               |
| 6    | 3         | 3         | 5     | 3          | 2          | 5355.0099          | 0.0003                               |
| 6    | 2         | 4         | 5     | 2          | 3          | 5440.6602          | 0.0040                               |
| 6    | 1         | 5         | 5     | 1          | 4          | 5442.2988          | -0.0005                              |
| 7    | 1         | 7         | 6     | 1          | 6          | 5957.2156          | -0.0006                              |
| 7    | 0         | 7         | 6     | 0          | 6          | 6002.2311          | -0.0050                              |
| 7    | 2         | 6         | 6     | 2          | 5          | 6167.9806          | 0.0025                               |
| 7    | 3         | 4         | 6     | 3          | 3          | 6264.8504          | -0.0030                              |
| 7    | 1         | 6         | 6     | 1          | 5          | 6322.3992          | -0.0010                              |
| 7    | 2         | 5         | 6     | 2          | 4          | 6370.5610          | -0.0059                              |
| 8    | 1         | 8         | 7     | 1          | 7          | 6794.8988          | 0.0011                               |
| 8    | 0         | 8         | 7     | 0          | 7          | 6826.2732          | -0.0019                              |
| 8    | 3         | 5         | 7     | 3          | 4          | 7184.8207          | -0.0060                              |
| 8    | 1         | 7         | 7     | 1          | 6          | 7187.8917          | -0.0037                              |
| 8    | 2         | 6         | 7     | 2          | 5          | 7295.8982          | -0.0115                              |
| 9    | 1         | 9         | 8     | 1          | 8          | 7630.0783          | 0.0079                               |
| 9    | 0         | 9         | 8     | 0          | 8          | 7650.6759          | 0.0032                               |
| 9    | 2         | 8         | 8     | 2          | 7          | 7893.1912          | 0.0091                               |
| 3    | 1         | 3         | 2     | 1          | 2          | 2571.7070          | -0.0070                              |
| 3    | 0         | 3         | 2     | 0          | 2          | 2640.1849          | 0.0006                               |

**Table S11.** Experimental spectroscopic parameters of the single substituted  $^{13}\text{C}_1$ -ethanol conformers of fenchone-ethanol complex.

|                             | $^{13}\text{C}_1\text{-I}$ | $^{13}\text{C}_1\text{-II}$ | $^{13}\text{C}_1\text{-III}$ |
|-----------------------------|----------------------------|-----------------------------|------------------------------|
| A(MHz) <sup>a</sup>         | 1076.696(22) <sup>e</sup>  | 1106.13199(63)              | 930.597(12)                  |
| B(MHz)                      | 387.02067(44)              | 393.20002(12)               | 470.08912(36)                |
| C(MHz)                      | 353.30343(42)              | 347.85084(14)               | 413.99879(33)                |
| $\Delta_J$ (kHz)            | 0.2293(10)                 | 0.1127(67)                  | 0.1096(28)                   |
| $\Delta_{JK}$ (kHz)         | 0.295(43)                  | 0.171(54)                   | 0.247 (41)                   |
| $\delta_J$ (kHz)            | -0.0420(14)                | -                           | -                            |
| $a/b/c^b$                   | y/n/n                      | y/n/y                       | y/n/n                        |
| N <sup>c</sup>              | 43                         | 78                          | 31                           |
| $\sigma$ (kHz) <sup>d</sup> | 5                          | 5                           | 5                            |

<sup>a</sup> A, B and C are the rotational constants.  $\Delta_J$ ,  $\Delta_{JK}$  and  $\delta_J$  are the centrifugal distortion constants.

<sup>b</sup>  $a$ ,  $b$  and  $c$  represent the type of transitions observed in the rotational spectrum.

<sup>c</sup> N is the number of the fitted transitions.

<sup>d</sup>  $\sigma$  is the rms deviation of the fit.

<sup>e</sup> Standard error in parentheses in units of the last digit.

**Table S12.** Experimental spectroscopic parameters of the single substituted  $^{13}\text{C}_2$ -ethanol conformers of fenchone-ethanol complex.

|                             | $^{13}\text{C}_2\text{-I}$ | $^{13}\text{C}_2\text{-II}$ | $^{13}\text{C}_2\text{-III}$ |
|-----------------------------|----------------------------|-----------------------------|------------------------------|
| A(MHz) <sup>a</sup>         | 1072.382(25) <sup>e</sup>  | 1102.92519(37)              | 926.640(10)                  |
| B(MHz)                      | 386.95221(44)              | 393.31118(13)               | 471.71815(26)                |
| C(MHz)                      | 353.58768(42)              | 347.86197(14)               | 414.92110(30)                |
| $\Delta_J$ (kHz)            | 0.2493(10)                 | 0.12172(73)                 | 0.1201(17)                   |
| $\Delta_{JK}$ (kHz)         | 0.304(19)                  | 0.1474(76)                  | 0.126(15)                    |
| $\delta_{JK}$ (kHz)         | -0.0462(14)                | -                           | -                            |
| $a/b/c^b$                   | y/n/n                      | y/n/y                       | y/n/n                        |
| N <sup>c</sup>              | 46                         | 84                          | 41                           |
| $\sigma$ (kHz) <sup>d</sup> | 5                          | 5                           | 5                            |

<sup>a</sup> A, B and C are the rotational constants.  $\Delta_J$ ,  $\Delta_{JK}$  and  $\delta_{JK}$  are the centrifugal distortion constants.

<sup>b</sup>  $a$ ,  $b$  and  $c$  represent the type of transitions observed in the rotational spectrum.

<sup>c</sup> N is the number of the fitted transitions.

<sup>d</sup>  $\sigma$  is the rms deviation of the fit.

<sup>e</sup> Standard error in parentheses in units of the last digit.

**Table S13.** Comparison between substitution and equilibrium B3LYP-D3BJ/6-311++G(d,p) coordinates determined for the C<sub>1</sub> of ethanol.

| $r_s$                        |                          | $r_e$      |      |          |      |          |      |          |      |          |      |          |      |
|------------------------------|--------------------------|------------|------|----------|------|----------|------|----------|------|----------|------|----------|------|
| $^{13}\text{C}_1\text{-I}$   |                          | ta1        |      | ta2      |      | g+a1     |      | g+a2     |      | g-a1     |      | g-a2     |      |
|                              |                          | $\Delta^c$ |      | $\Delta$ |      |
| $ a ^a$                      | 4.26767(37) <sup>b</sup> | 3.866      | 0.4  | 4.075    | 0.2  | 4.175    | 0.1  | 4.057    | 0.2  | 4.073    | 0.2  | 4.172    | 0.1  |
| $ b $                        | 0.3643(43)               | 0.710      | -0.3 | 0.806    | -0.4 | 0.411    | 0.0  | 0.093    | 0.3  | 0.208    | 0.2  | 0.169    | 0.2  |
| $ c $                        | 0.1641(96)               | 0.480      | -0.3 | 0.102    | 0.1  | 0.213    | 0.0  | 0.393    | -0.2 | 0.503    | -0.3 | 0.488    | -0.3 |
| $r_s$                        |                          | $r_e$      |      |          |      |          |      |          |      |          |      |          |      |
| $^{13}\text{C}_1\text{-II}$  |                          | ta1        |      | ta2      |      | g+a1     |      | g+a2     |      | g-a1     |      | g-a2     |      |
|                              |                          | $\Delta$   |      | $\Delta$ |      | $\Delta$ |      | $\Delta$ |      | $\Delta$ |      | $\Delta$ |      |
| $ a $                        | 4.24665(37)              | 3.866      | 0.4  | 4.075    | 0.2  | 4.175    | 0.1  | 4.057    | 0.2  | 4.073    | 0.2  | 4.172    | 0.1  |
| $ b $                        | 0.1989(80)               | 0.710      | -0.5 | 0.806    | -0.6 | 0.411    | -0.2 | 0.093    | 0.1  | 0.208    | 0.0  | 0.169    | 0.0  |
| $ c $                        | 0.4752(33)               | 0.480      | 0.0  | 0.102    | 0.4  | 0.213    | 0.3  | 0.393    | 0.1  | 0.503    | 0.0  | 0.488    | 0.0  |
| $r_s$                        |                          | $r_e$      |      |          |      |          |      |          |      |          |      |          |      |
| $^{13}\text{C}_1\text{-III}$ |                          | tb         |      | g+b      |      | g-b      |      |          |      |          |      |          |      |
|                              |                          | $\Delta$   |      | $\Delta$ |      | $\Delta$ |      |          |      |          |      |          |      |
| $ a $                        | 3.93108(41)              | 3.308      | 0.6  | 3.260    | 0.7  | 3.917    | 0.0  |          |      |          |      |          |      |
| $ b $                        | 0.20379(79)              | 0.800      | -0.6 | 0.095    | 0.1  | 0.290    | 0.0  |          |      |          |      |          |      |
| $ c $                        | 0.127(13)                | 0.021      | 0.1  | 0.711    | -0.6 | 0.064    | 0.0  |          |      |          |      |          |      |

<sup>a</sup>  $a$ ,  $b$  and  $c$  are coordinates in angstroms of the C<sub>1</sub> carbon atom of ethanol in their absolute values.

<sup>b</sup> Standard error in parentheses in units of the last digit.

<sup>c</sup> Calculated differences between substitution and equilibrium coordinates.

**Table S14.** Comparison between substitution and equilibrium B3LYP-D3BJ/6-311++G(d,p) coordinates determined for the C<sub>2</sub> of ethanol.

| $r_s$                        |                          | $r_e$      |      |          |      |          |      |          |      |          |      |          |      |
|------------------------------|--------------------------|------------|------|----------|------|----------|------|----------|------|----------|------|----------|------|
| $^{13}\text{C}_2\text{-I}$   |                          | ta1        |      | ta2      |      | g+a1     |      | g+a2     |      | g-a1     |      | g-a2     |      |
|                              |                          | $\Delta^c$ |      | $\Delta$ |      |
| $ a ^a$                      | 4.09557(37) <sup>b</sup> | 5.167      | -1.1 | 5.344    | -1.2 | 3.947    | 0.1  | 4.607    | -0.5 | 4.629    | 0.5  | 4.035    | 0.1  |
| $ b $                        | 0.62584(43)              | 0.068      | 0.6  | 0.006    | 0.6  | 0.645    | 0.0  | 1.121    | -0.5 | 1.176    | -0.5 | 0.943    | -0.3 |
| $ c $                        | 1.30526(96)              | 0.399      | 0.9  | 0.082    | 1.2  | 1.278    | 0.0  | 0.347    | 1.0  | 0.186    | 1.1  | 0.819    | 0.5  |
| $r_s$                        |                          | $r_e$      |      |          |      |          |      |          |      |          |      |          |      |
| $^{13}\text{C}_2\text{-II}$  |                          | ta1        |      | ta2      |      | g+a1     |      | g+a2     |      | g-a1     |      | g-a2     |      |
|                              |                          | $\Delta$   |      | $\Delta$ |      | $\Delta$ |      | $\Delta$ |      | $\Delta$ |      | $\Delta$ |      |
| $ a $                        | 4.14172(38)              | 5.167      | -1.0 | 5.344    | -1.2 | 3.947    | 0.2  | 4.607    | -0.5 | 4.629    | -0.5 | 4.035    | 0.1  |
| $ b $                        | 0.9306(17)               | 0.068      | 0.9  | 0.006    | 0.9  | 0.645    | 0.3  | 1.121    | -0.2 | 1.176    | -0.2 | 0.943    | 0.0  |
| $ c $                        | 0.8533(18)               | 0.399      | 0.5  | 0.082    | 0.7  | 1.278    | -0.4 | 0.347    | 0.5  | 0.186    | 0.7  | 0.819    | 0.0  |
| $r_s$                        |                          | $r_e$      |      |          |      |          |      |          |      |          |      |          |      |
| $^{13}\text{C}_2\text{-III}$ |                          | tb         |      | g+b      |      | g-b      |      |          |      |          |      |          |      |
|                              |                          | $\Delta$   |      | $\Delta$ |      | $\Delta$ |      |          |      |          |      |          |      |
| $ a $                        | 3.3199(11)               | 4.482      | -1.1 | 3.848    | -0.5 | 3.230    | 0.1  |          |      |          |      |          |      |
| $ b $                        | 1.3180(27)               | 0.359      | 1.0  | 1.139    | 0.2  | 1.182    | 0.1  |          |      |          |      |          |      |
| $ c $                        | 0.8379(43)               | 0.834      | 0.0  | 0.038    | 0.8  | 0.967    | -0.1 |          |      |          |      |          |      |

<sup>a</sup>  $a$ ,  $b$  and  $c$  are coordinates in angstroms of the C<sub>1</sub> carbon atom of ethanol in their absolute values.

<sup>b</sup> Standard error in parentheses in units of the last digit.

<sup>c</sup> Calculated differences between substitution and equilibrium coordinates.

**Table S15** Calculated energies in Hartree at different levels of theory of the lower-energy conformers of fenchone-ethanol.

| Conformer   | MP2/6-311G++(d,p) |              | M062X/6-311G++(d,p) |              | B3LYP-D3BJ/6-311G++(d,p) |              |
|-------------|-------------------|--------------|---------------------|--------------|--------------------------|--------------|
|             | E(h)              | E+ZPC(h)     | E(h)                | E+ZPC(h)     | E(h)                     | E+ZPC (h)    |
| <i>ta1</i>  | -619.319654       | -618.993585  | -620.8717541        | -620.5466451 | -621.2225426             | -620.9003176 |
| <i>ta2</i>  | -619.3196034      | -618.9936094 | -620.8716684        | -620.5468524 | -621.2225823             | -620.9005063 |
| <i>g+a1</i> | -619.3200179      | -618.9937579 | -620.872125         | -620.546738  | -621.2229222             | -620.9005102 |
| <i>g+a2</i> | -619.3198612      | -618.9936732 | -620.8719915        | -620.5467255 | -621.2227725             | -620.9003595 |
| <i>g-a1</i> | -619.3198301      | -618.9936111 | -620.8718587        | -620.5467927 | -621.222728              | -620.900275  |
| <i>g-a2</i> | -619.3200577      | -618.9938197 | -620.8721397        | -620.5467937 | -621.2229526             | -620.9006786 |
| <i>tb</i>   | -619.3194941      | -618.9936801 | -620.8712201        | -620.5457851 | -621.2215676             | -620.8995096 |
| <i>g+b</i>  | -619.3199483      | -618.9939133 | -620.8716967        | -620.5468647 | -621.2220599             | -620.8998619 |
| <i>g-b</i>  | -619.3201437      | -618.9939407 | -620.8718288        | -620.5465378 | -621.2224042             | -620.9002152 |
| <i>tc</i>   | -619.3186447      | -618.9930527 | -620.8711281        | -620.5458891 | -621.2204224             | -620.8986144 |
| <i>g+c</i>  | -619.3190733      | -618.9931293 | -620.871874         | -620.546546  | -621.2214833             | -620.8989693 |
| <i>g-c</i>  | -619.3187749      | -618.9929229 | -620.8711557        | -620.5462477 | -621.2212483             | -620.8992793 |



**Figure S1.** Potential energy barriers of fenchone-ethanol obtained by scanning the  $\angle C_2^{et}C_1^{et}O^{et}O^f$  dihedral angle for the **a** (top), **b** (middle) and **c** (bottom) interaction sites.

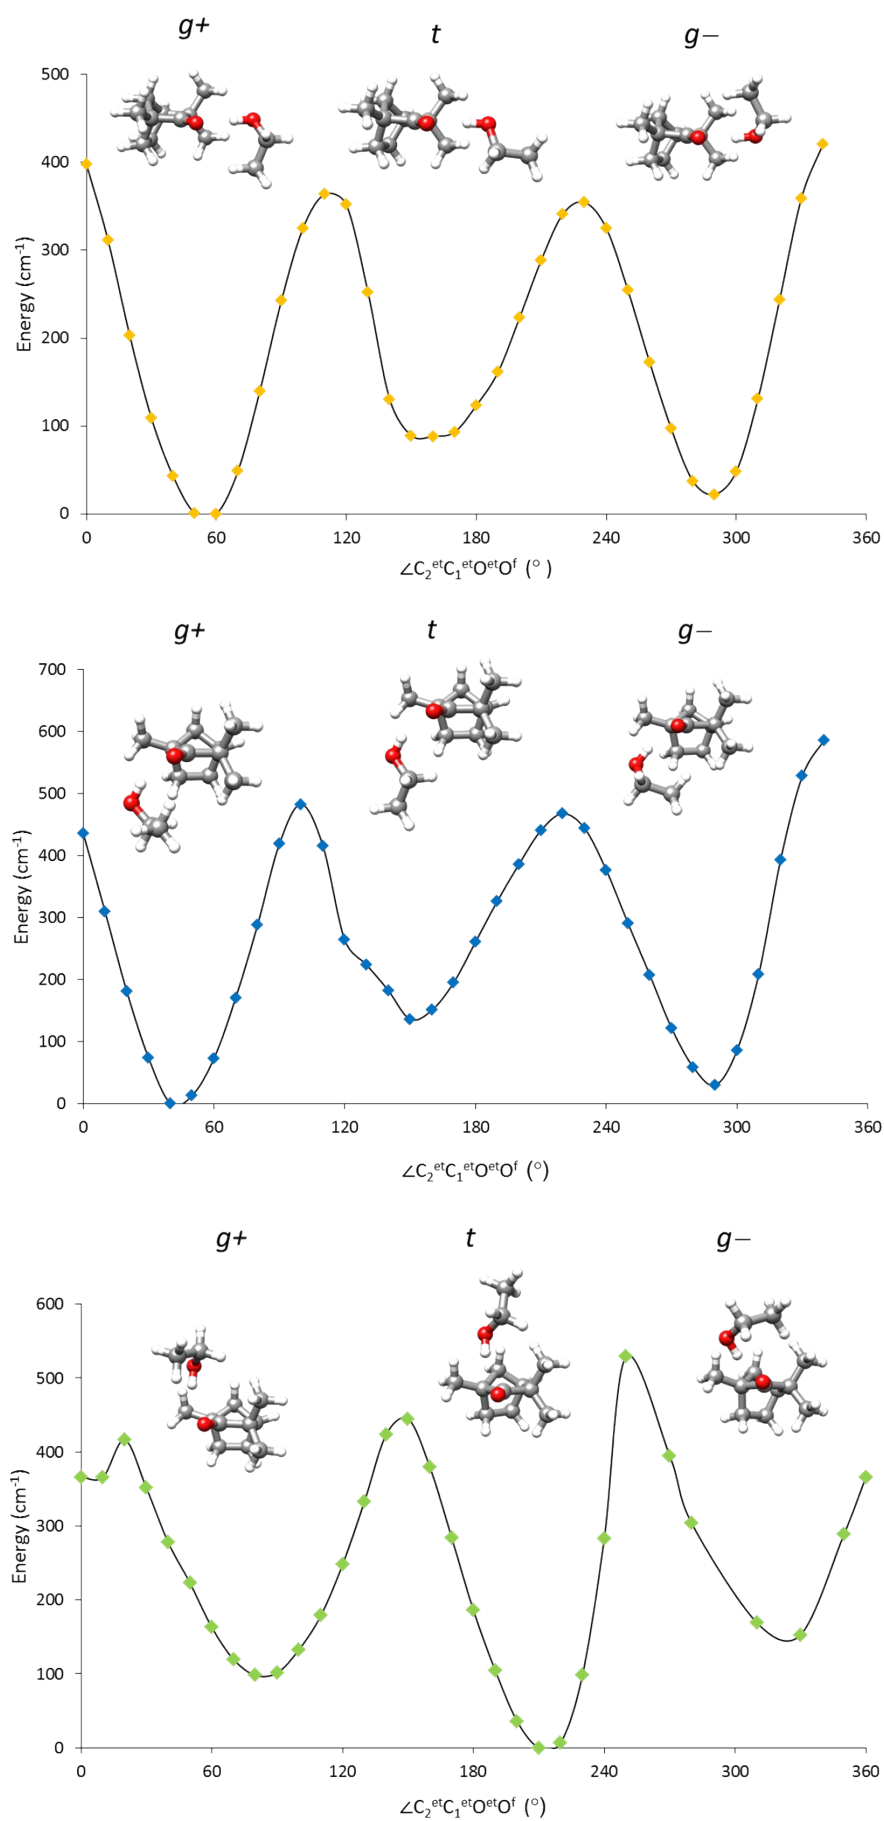

**Figure S2.** Potential energy barriers (M062X/6-311++G(d,p)) for the complex of fenchone with *trans* ethanol obtained by scanning the  $\angle C_1^{et}O^{et}O^fC_2^f$  dihedral angle for the **a** (top), **b** (middle) and **c** (bottom) interaction sites. Minima not indicated were found not to be realminima once the structures were optimised without any constrains.

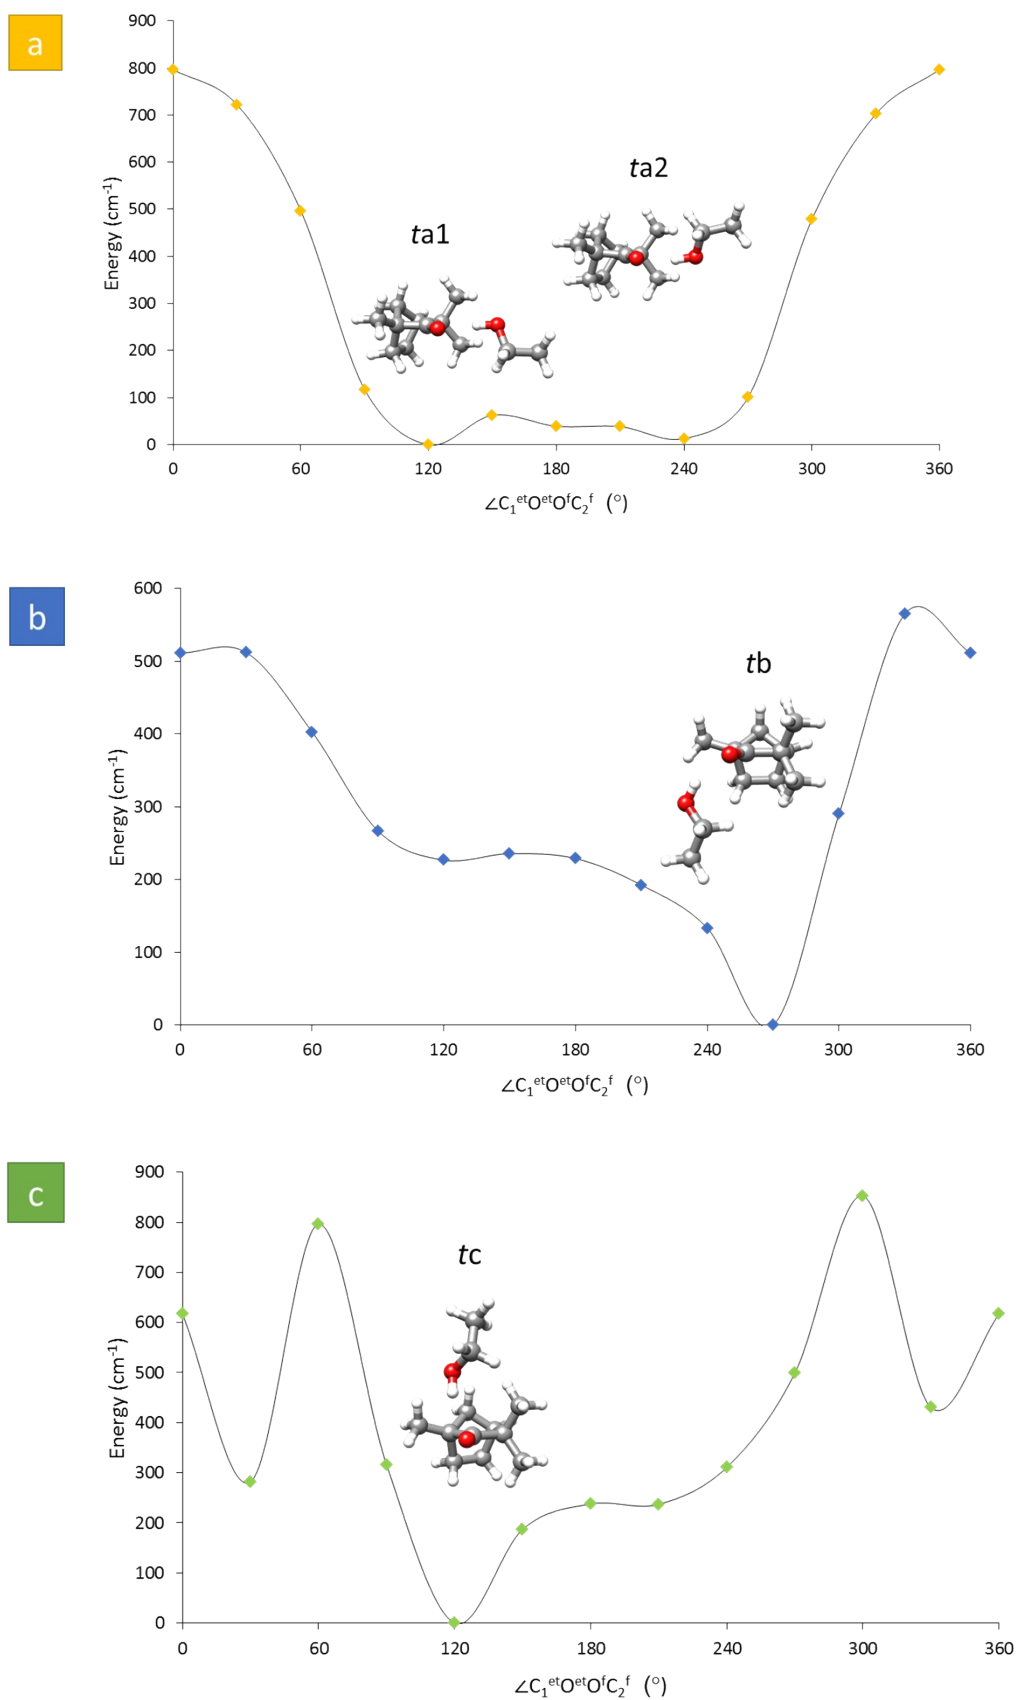

**Figure S3.** Potential energy barriers (M062X/6-311++G(d,p)) for the complex of fenchone with *g*+ ethanol obtained by scanning the  $\angle C_1^{et}O^{et}O^fC_2^f$  dihedral angle for the **a** (top), **b** (middle) and **c** (bottom) interaction sites. Minima not indicated were found not to be realminima once the structures were optimised without any constrains.

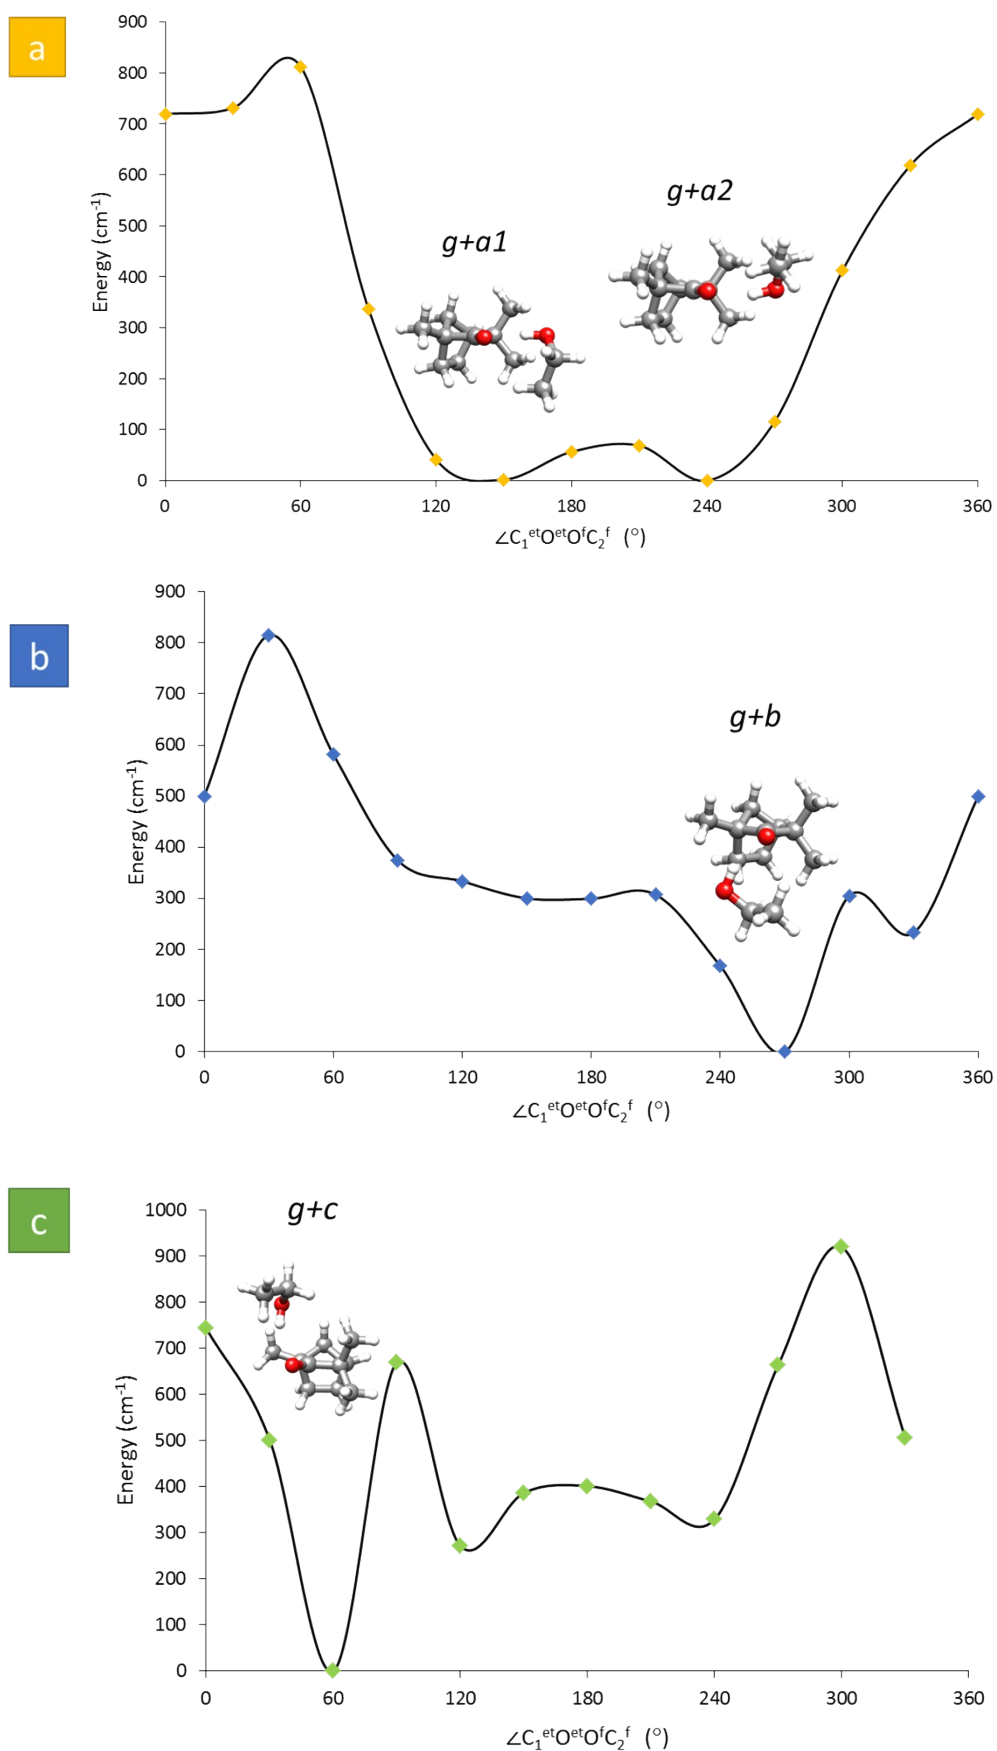

**Figure S4.** Potential energy barriers (M062X/6-311++G(d,p)) for the complex of fenchone with *g*- ethanol obtained by scanning the  $\angle C_1^{et}O^{et}O^fC_2^f$  dihedral angle for the **a** (top), **b** (middle) and **c** (bottom) interaction sites. Minima not indicated were found not to be realminima once the structures were optimised without any constrains.

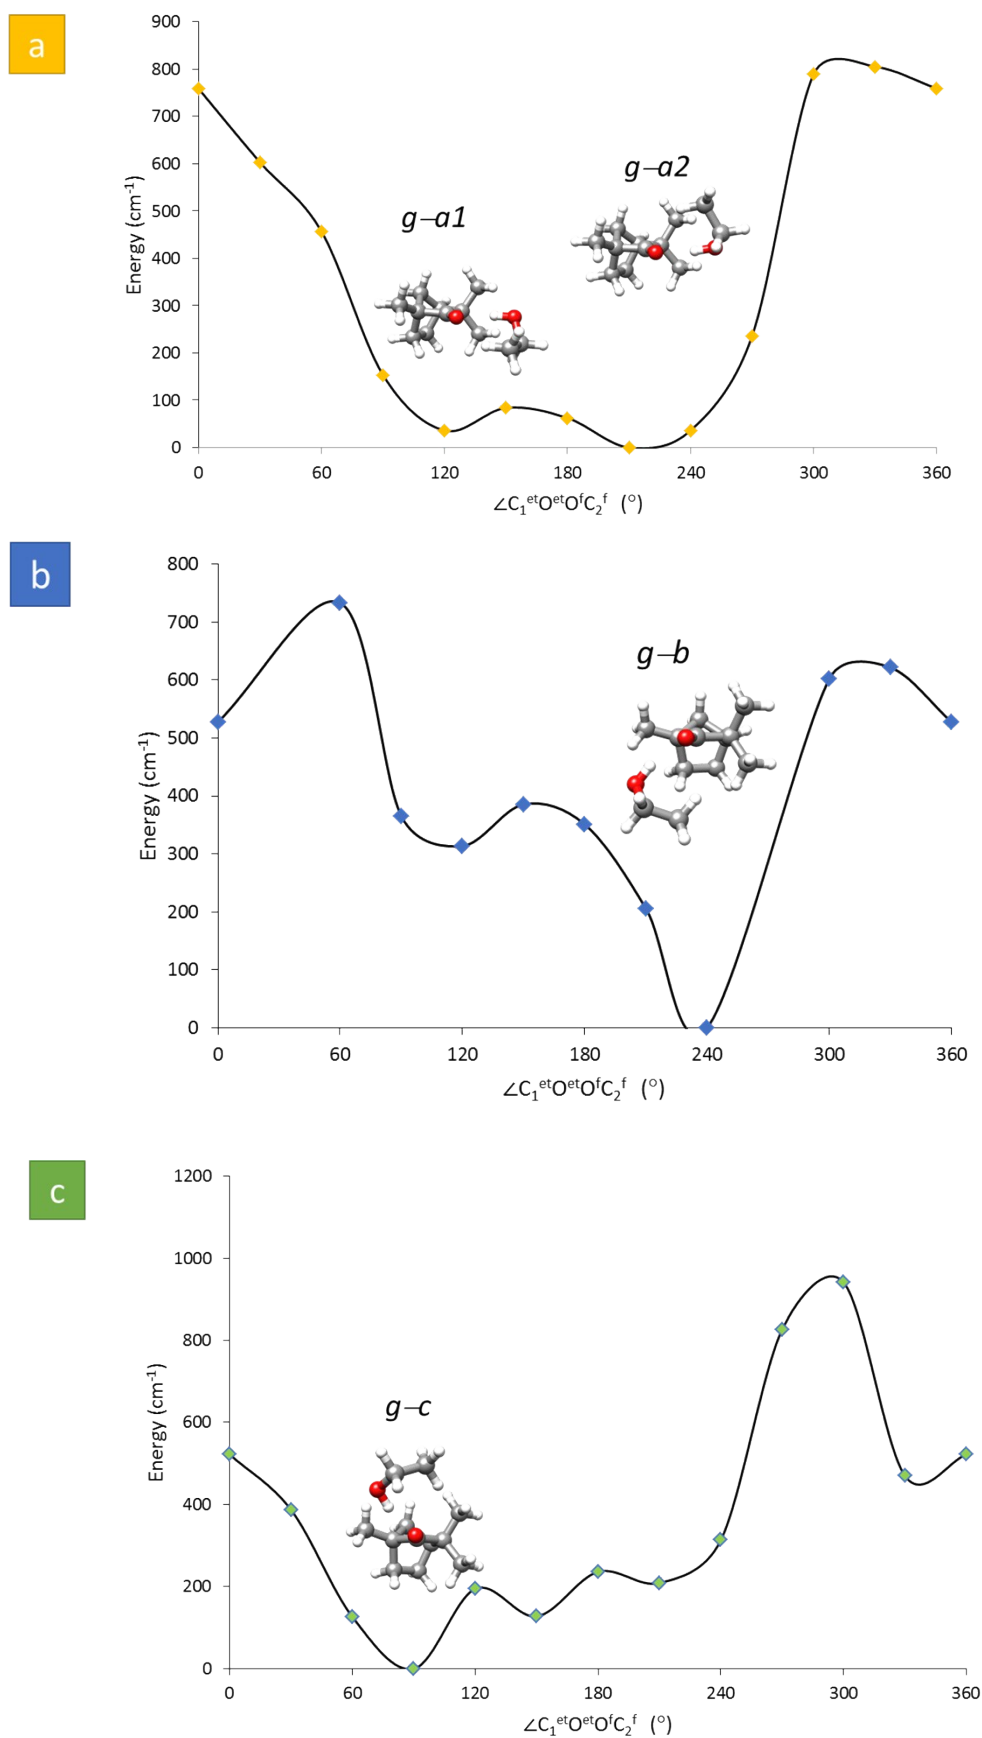

Supplement: c8cp06970k1.pdf [file c8cp06970k1.pdf]
